# Supplementary material
Source: Springer Nature journal article supplement (http://www.springermedizin.de/resource/supplementary/12992_2012_181_MOESM4_ESM.docx/9616636)
Supplement: MOESM4 [file 9616636]

Table 4: Reasons for Migration

|  | Mean | S.D. |
| --- | --- | --- |
| Relatives | 3.23 | 1.706 |
| Lucrative Salary | 4.23 | 1.031 |
| Harassment of Doctors in Pakistan | 3.01 | 1.489 |
| Peer Pressure | 2.12 | 1.048 |
| Quality of Training | 3.89 | 1.365 |
| Better Working Environment | 2.97 | 1.674 |
| Better Way of Life | 3.48 | 1.524 |
| Terrorism in Pakistan | 3.07 | 1.518 |
| More Opportunities | 3.31 | 1.410 |
| Better Management | 2.19 | 1.358 |
| Long Working Hours in Pakistan | 1.88 | 1.031 |
| Desire to Settle Abroad | 2.84 | 1.459 |
| Political Reasons | 1.23 | 0.698 |
| Religious Reasons | 1.46 | 0.915 |
| Parent Pressure | 1.35 | 0.832 |
| More Competition in Pakistan | 2.61 | 1.433 |
| More Job Satisfaction | 3.56 | 1.560 |
| Favoritism in Pakistan | 1.60 | 0.808 |
| Other | 1.13 | 0.486 |
| Total Score | 49.15 | 14.554 |
